# Supplementary material
Source: PubMed Central journal article supplement (PMC9715643)
Supplement: 41422_2022_746_MOESM3_ESM.pdf [file 41422_2022_746_MOESM3_ESM.pdf]

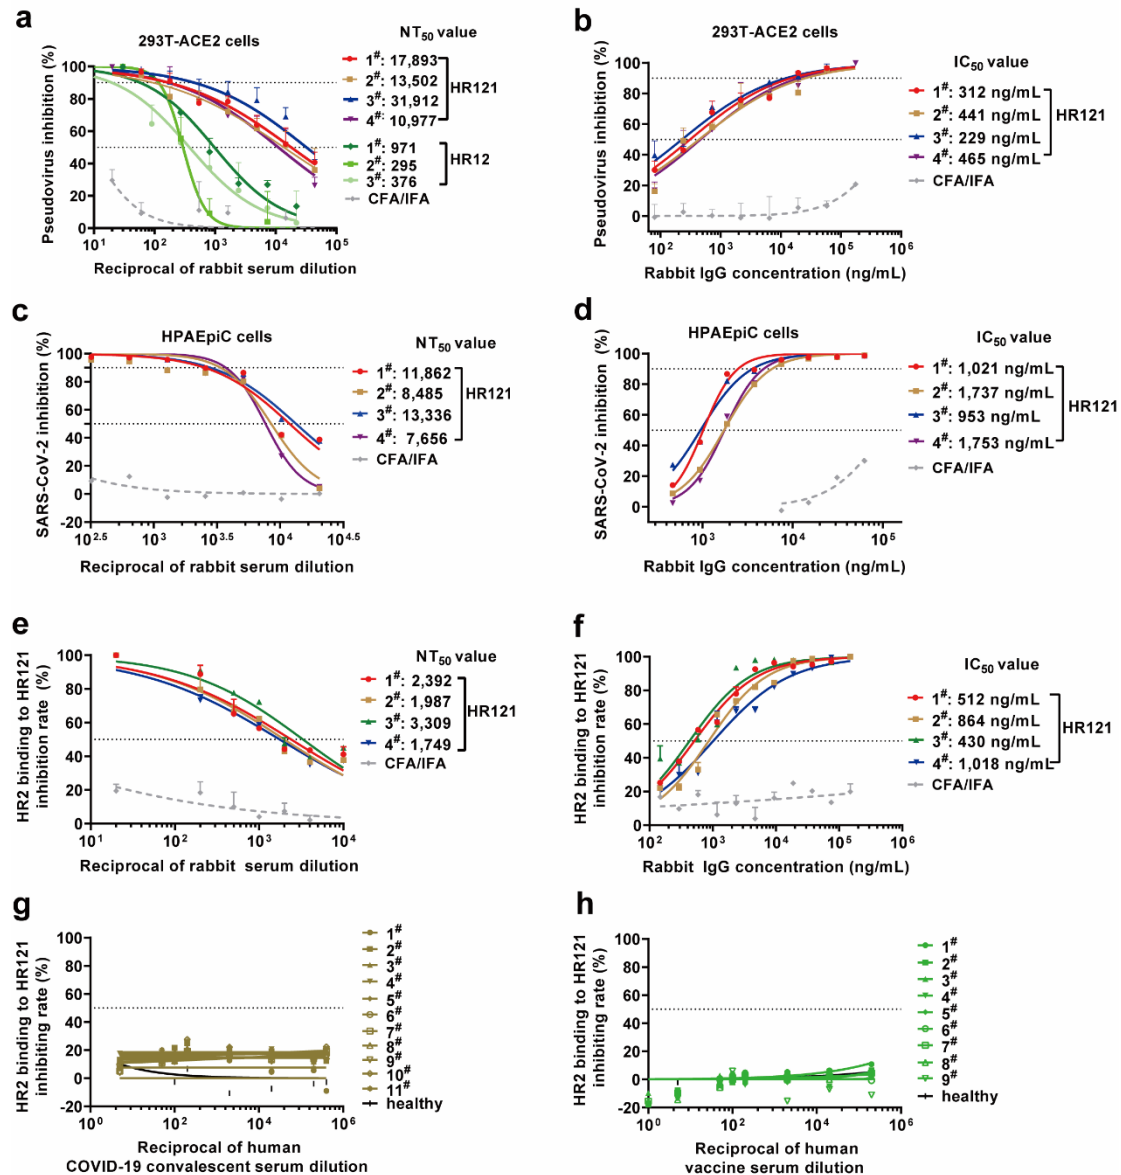

**Supplementary information, Fig. S3: Rabbit anti-HR121 sera and IgG could potently inhibit both SARS-CoV-2 replication and HR2 binding to HR121 in dose-dependent manners.**

**a, b** SARS-CoV-2 pseudovirus entering 293T-ACE2 cells was potently inhibited in a dose-dependent manner by rabbit anti-HR121 sera (**a**) and IgG (**b**). Here, rabbit anti-HR12 sera were set as controls in the pseudovirus assay. **c, d** SARS-CoV-2 replication in HPAEpiC cells was also blocked in a dose-dependent manner by rabbit anti-HR121 sera (**c**) and IgG (**d**). **e, f** HR2 binding to HR121 was potently inhibited by rabbit anti-HR121 sera (**e**) and IgG (**f**). **g, h** HR2 binding to HR121 was not disturbed by sera from human COVID-19 convalescents (**g**) and vaccinated individuals (**h**).
