# Supplementary material
Source: PubMed Central journal article supplement (PMC9715643)
Supplement: 41422_2022_746_MOESM4_ESM.pdf [file 41422_2022_746_MOESM4_ESM.pdf]

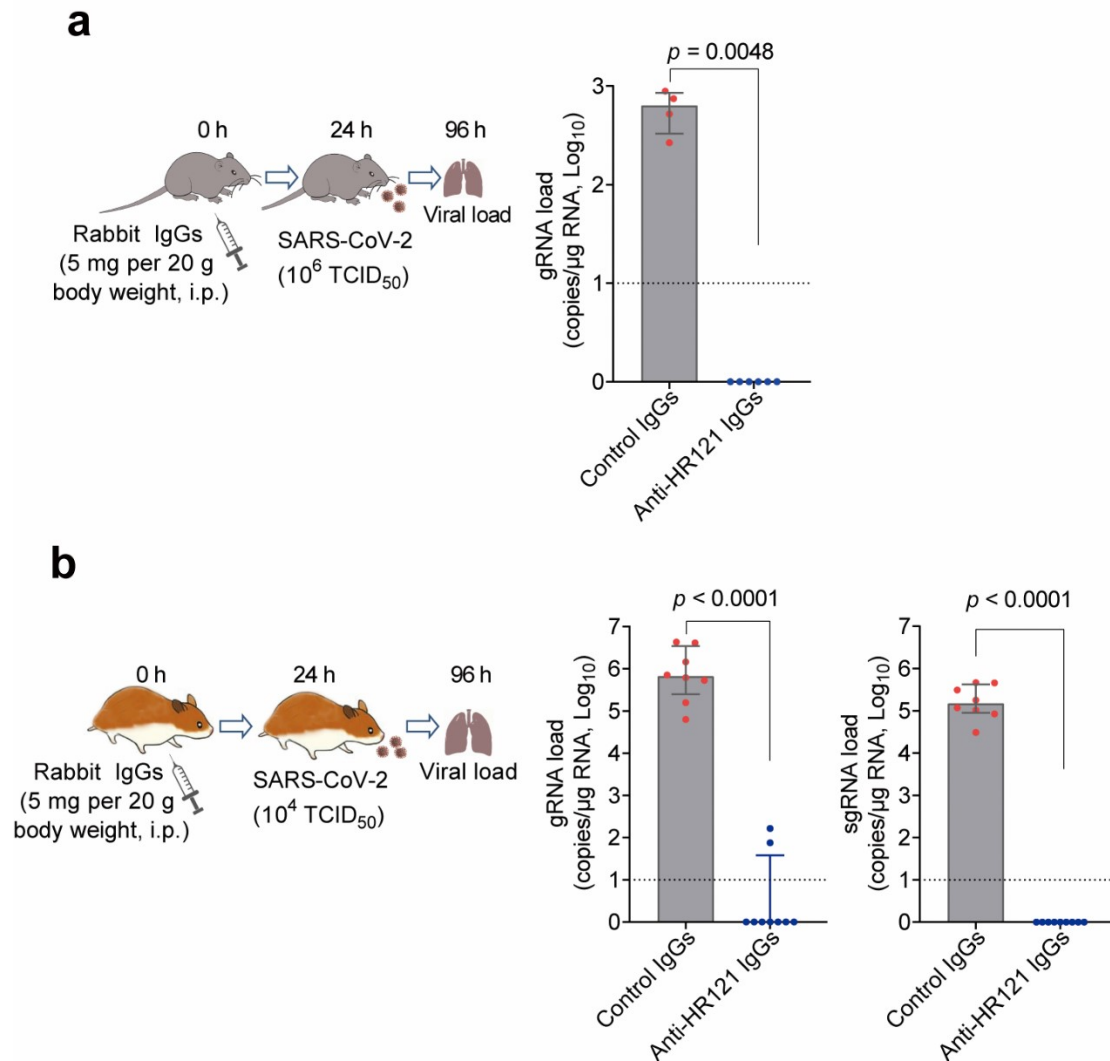

**Supplementary information, Fig. S4: Rabbit anti-HR121 IgGs could protect hACE2 mice (a) and Syrian golden hamsters (b) from SARS-CoV-2 infection.** SARS-CoV-2 gRNAs and sgRNAs were quantified by quantitative PCR with reverse transcription (RT-qPCR); each point represents a mouse or hamster; data are presented as median  $\pm$  interquartile range;  $p$  values are determined by two-tailed Mann-Whitney test.
