# Supplementary material
Source: PubMed Central journal article supplement (PMC9715643)
Supplement: 41422_2022_746_MOESM5_ESM.pdf [file 41422_2022_746_MOESM5_ESM.pdf]

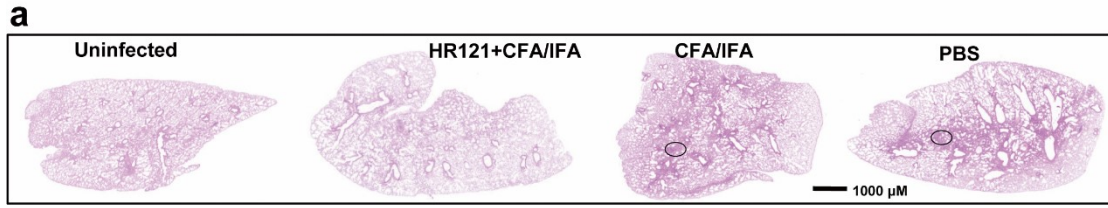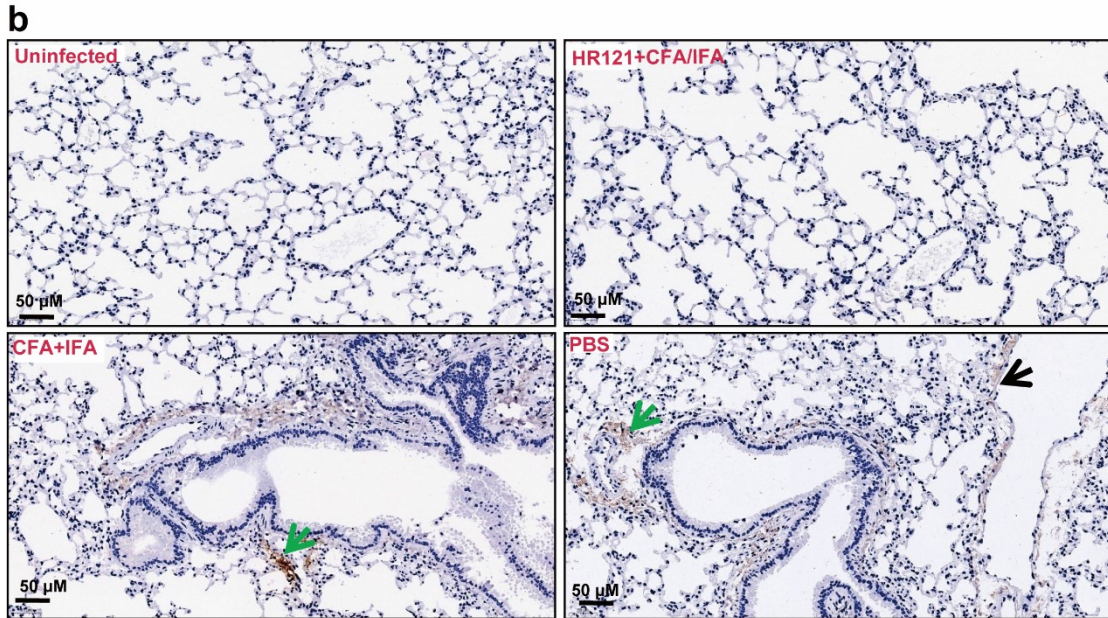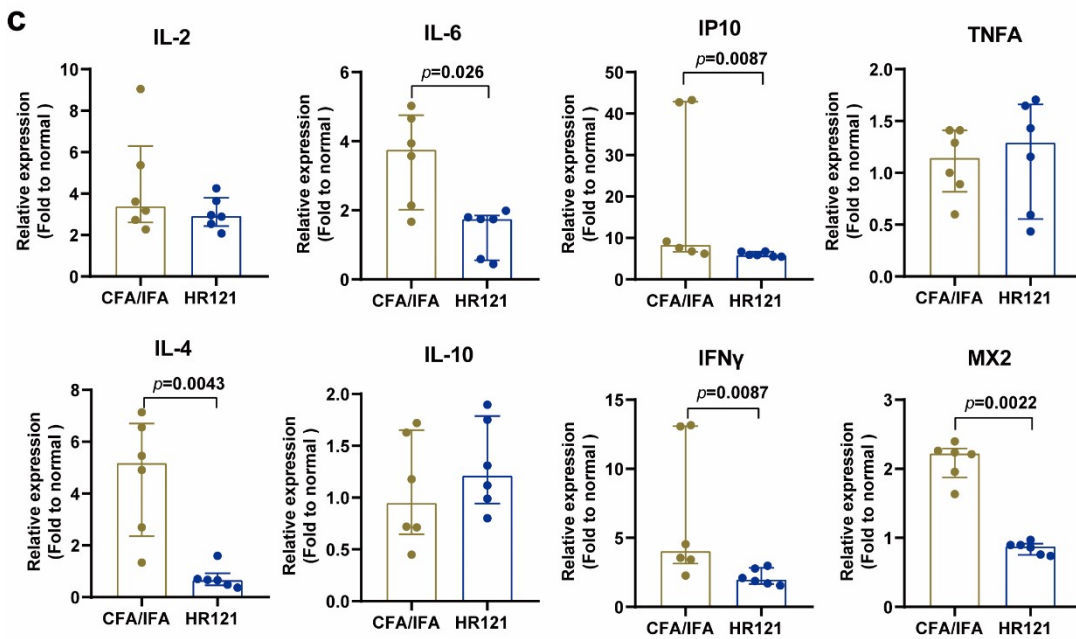

**Supplementary information, Fig. S5: Representative histopathological and cytokine gene changes in lung tissues of SARS-CoV-2-infected hACE-2 mice.**

**a** Scanning images of whole lung tissue sections by H&E staining. A representative image from uninfected hACE-2 mouse (n = 1), and SARS-CoV-2-infected hACE-2 mice vaccinated with HR121 plus CFA/IFA (n = 3), vaccinated with CFA/IFA (n = 3) and PBS (n = 3). **b** Nucleocapsid protein of SARS-CoV-2 immunostaining. In the mice immunized with HR121, no nucleocapsid proteins were detected after SARS-CoV-2 challenge, just as in uninfected mice. Meanwhile, in the CFA/IFA and PBS controls, nucleocapsid proteins were stained and, thus, detected around bronchial epithelial cells (black arrow) and alveolar epithelia (green arrow). A representative image from each group (n = 3) is shown. **c** Some antiviral and proinflammatory cytokine gene expression changes. Of 6/8 mice vaccinated with HR121, and 6/8 mice injected with CFA/IFA were selected for evaluation. Non-infected controls (n = 3). Data are presented as median  $\pm$  interquartile range (two tailed Mann-Whitney test).
