# Supplementary material
Source: PubMed Central journal article supplement (PMC9715643)
Supplement: 41422_2022_746_MOESM6_ESM.pdf [file 41422_2022_746_MOESM6_ESM.pdf]

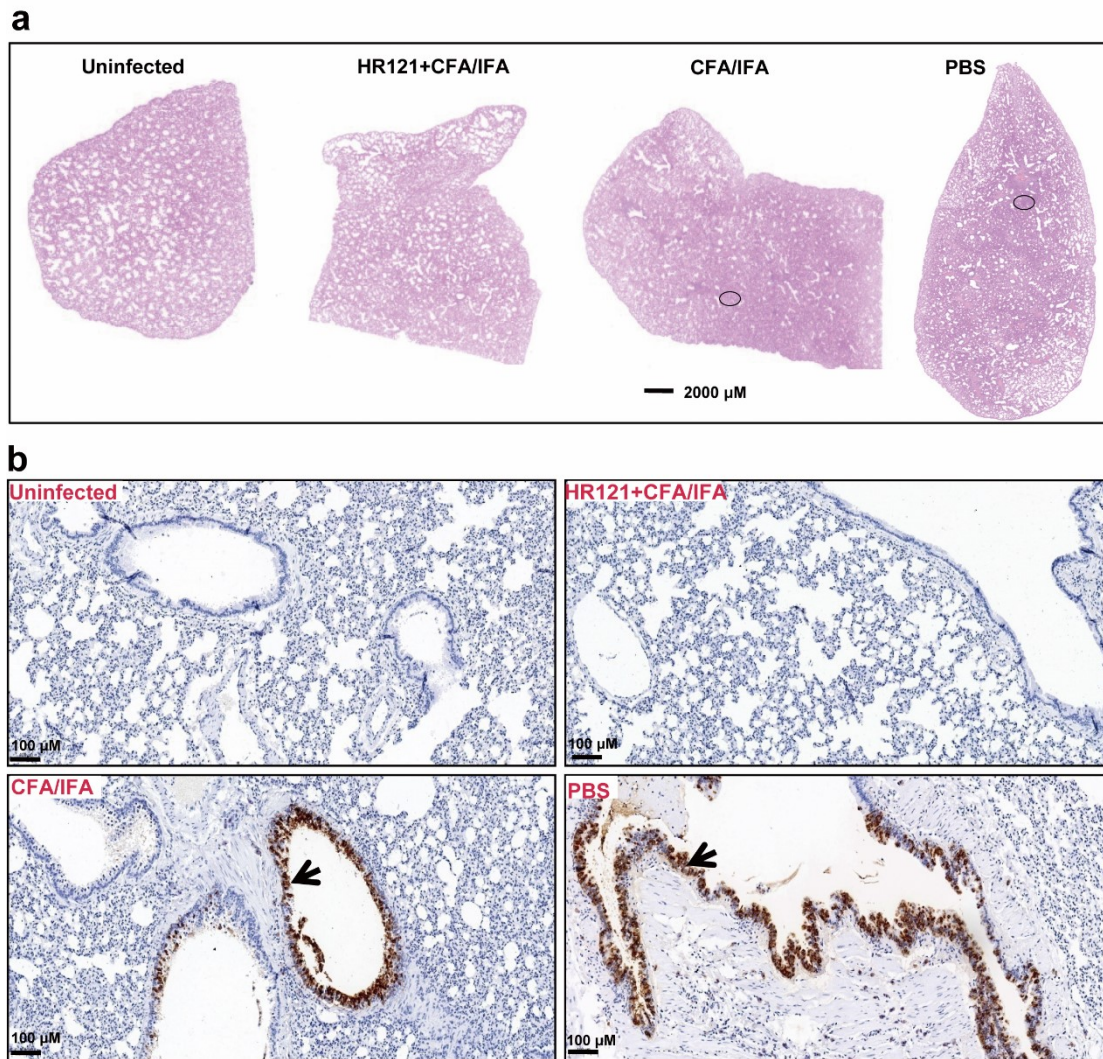

**Supplementary information, Fig. S6: Representative histopathological changes in lung tissues of SARS-CoV-2-infected Syrian golden hamsters.**

**a** Scanning images of whole lung tissue sections by H&E staining. A representative image from uninfected Syrian golden hamsters ( $n = 4$ ), and SARS-CoV-2-infected Syrian golden hamsters vaccinated with HR121 plus CFA/IFA ( $n = 6$ ), vaccinated with CFA/IFA ( $n = 6$ ) and PBS ( $n = 6$ ). **b** Nucleocapsid protein of SARS-CoV-2 immunostaining. In the hamsters immunized with HR121, no nucleocapsid proteins were detected after SARS-CoV-2 challenge, just as in uninfected hamsters. Meanwhile, in the groups of CFA/IFA and PBS controls, more stained nucleocapsid proteins were detected around bronchial epithelial cells (black arrow). A representative photograph of each group ( $n = 3$ ) is presented.
