# Supplementary material
Source: PubMed Central journal article supplement (PMC9715643)
Supplement: 41422_2022_746_MOESM7_ESM.pdf [file 41422_2022_746_MOESM7_ESM.pdf]

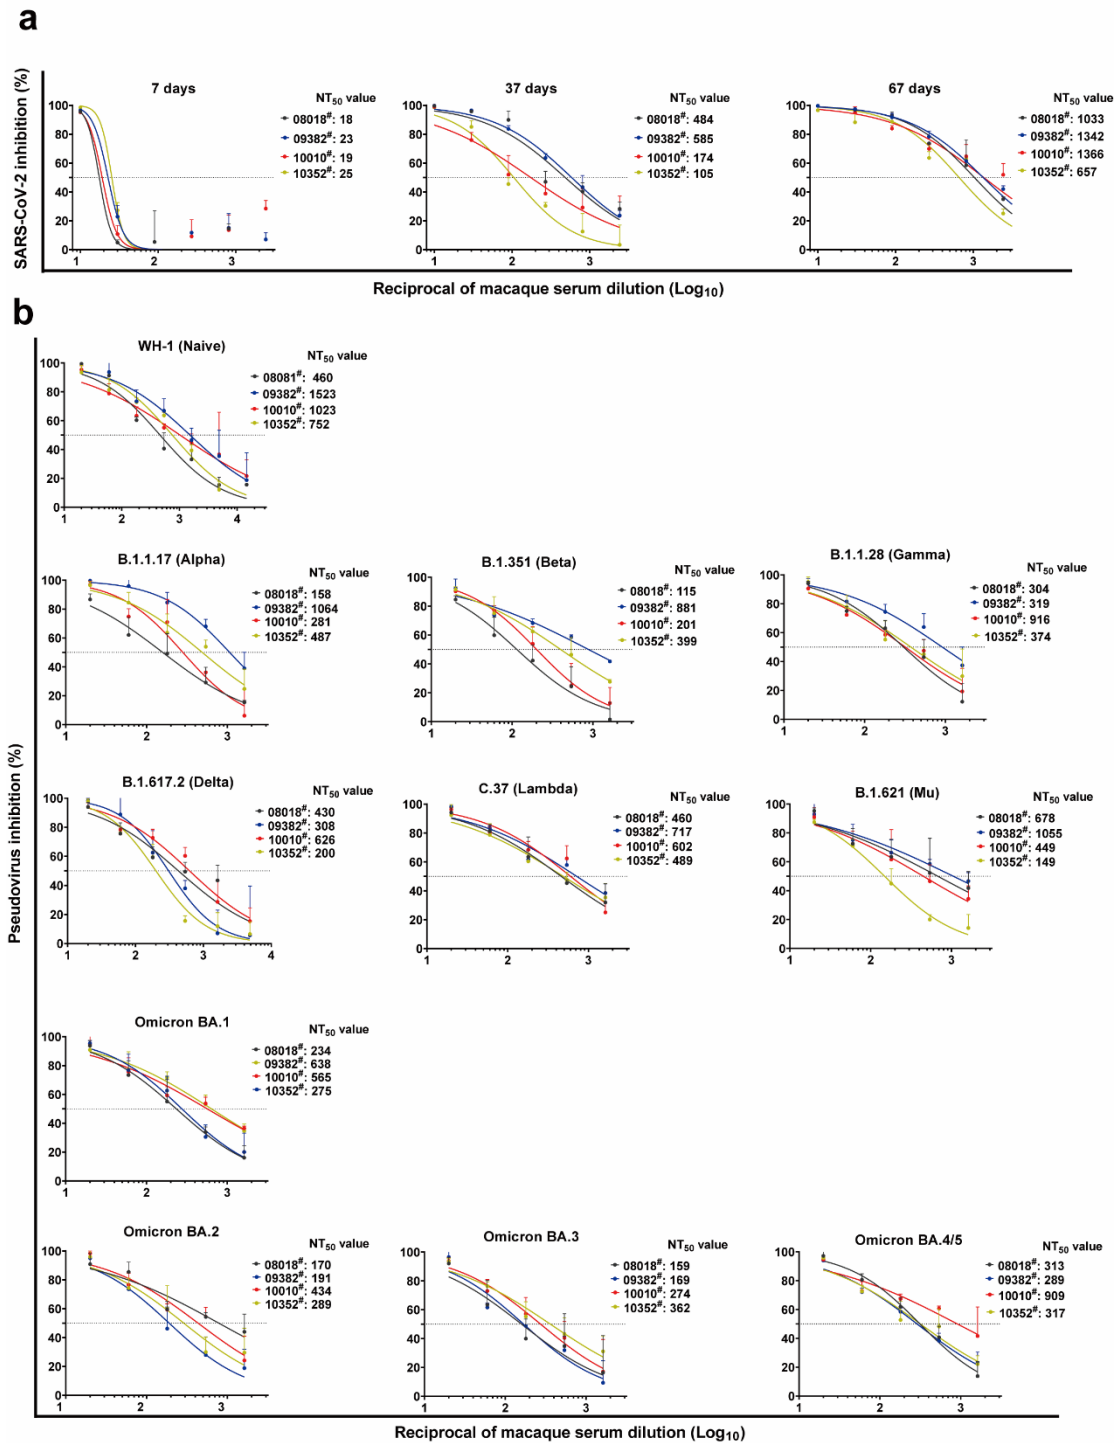

**Supplementary information, Fig. S7: Rhesus macaques anti-HR121 sera demonstrated broadly antiviral activities against SARS-CoV-2 and its main ancestral and current variants.**

**a** SARS-CoV-2 replication in HPAEpiC cells were inhibited in a dose-dependent manner by macaque anti-HR121 sera post 7 days of each immunization. **b** VSV-based pseudoviruses enveloped with different SARS-CoV-2 spikes entering 293T-ACE2 cells were inhibited in a dose-dependent manner by macaque anti-HR121 sera.
