# Supplementary material
Source: PubMed Central journal article supplement (PMC9715643)
Supplement: 41422_2022_746_MOESM9_ESM.pdf [file 41422_2022_746_MOESM9_ESM.pdf]

Supplementary information, Table S1: Data collection and refinement statistics

| <b>Data collection</b>                  | <b>SARS-CoV-2 HR121</b>       |
|-----------------------------------------|-------------------------------|
| <b>Space group</b>                      | <b>P 1 2 1</b>                |
| <b>Cell dimensions</b>                  |                               |
| a, b, c (Å)                             | 65.16, 51.73, 119.16          |
| $\alpha$ , $\beta$ , $\gamma$ (°)       | 90.00, 95.33, 90.00           |
| Wavelength (Å)                          | 0.9791                        |
| Resolution (Å)                          | 32.46 - 2.41 (32.55 - 2.41)   |
| R <sub>merge</sub>                      | 0.02889 (0.9947)              |
| CC <sub>1/2</sub>                       | 1 (0.434)                     |
| Mean I/ $\sigma$ (I)                    | 10.62 (0.84)                  |
| Completeness (%)                        | 99.46 (99.58)                 |
| Redundancy                              | 2.0 (2.0)                     |
| <b>Refinement</b>                       |                               |
| Resolution (Å)                          | 32.46-2.41                    |
| Total reflections                       | 61592 (6140)                  |
| R <sub>work</sub> /R <sub>free</sub>    | 0.2489/0.2913 (0.4572/0.5382) |
| <b>No. of atoms</b>                     |                               |
| Protein                                 | 757                           |
| Water & ligands                         | 0                             |
| <b>Average B-factor (Å<sup>2</sup>)</b> |                               |
| Overall                                 | 91.01                         |
| Water & ligands                         | 0                             |
| <b>R.m.s. deviations</b>                |                               |
| Bond lengths (Å)                        | 0.013                         |
| Bond angles (°)                         | 1.53                          |
| Ramachandran outliers (%)               | 10.64                         |
| <b>Ramachandran plot (%)</b>            |                               |
| Favored region                          | 99.18                         |
| Allowed region                          | 0.82                          |
| Disallowed region                       | 0.00                          |

\*Highest resolution shell is shown in parentheses.
