# Supplementary material
Source: PubMed Central journal article supplement (PMC9715643)
Supplement: 41422_2022_746_MOESM10_ESM.pdf [file 41422_2022_746_MOESM10_ESM.pdf]

**Supplementary information, Table S2: Primers to generate point mutants in the recombinant plasmid pcDNA3.1-SARS-CoV-2-SΔ18.**

| <b>point mutants</b> | <b>Forward primer (5'-3')</b>  | <b>Reverse Primer (5'-3')</b>  |
|----------------------|--------------------------------|--------------------------------|
| D614G                | TGGCTGTGCTCTACCAGGGAGTGAAGTGA  | TCCCTGGTAGAGCACAGCCACCTGGTTGCT |
| S477N                | AGATTACCAGGCTGGCAACACACCATGTA  | GTTGCCAGCCTGGTAAATCTCTGTGCTGAT |
| A222V                | TGCCACAGGGCTTCTCTGTCTTGAACCAC  | GACAGAGAAGCCCTGTGGCAGGTCCTCAC  |
| E484K                | CACCATGTAATGGAGTGAAGGGCTTCAACT | CTTCACTCCATTACATGGTGTGCTGCCAGC |
| K417N                | CCCCTGGACAAACAGGCAACATTGCTGACT | GTTGCCTGTTTGTCCAGGGGCAATCTGTCT |
| D839Y                | TCATCAAGCAATATGGATACTGTCTGGGAG | GTATCCATATTGCTTGATGAAGCCAGCATC |
| N439K                | TGATTGCCTGGAACAGCAACAACCTGGACA | GAACGACAAGGTCCGTTAGTGTGTCGGACA |
