# Supplementary material
Source: PubMed Central journal article supplement (PMC9715643)
Supplement: 41422_2022_746_MOESM11_ESM.pdf [file 41422_2022_746_MOESM11_ESM.pdf]

## Supplementary information, Table S3: SARS-CoV-2-S circulating variants

constructed in this study.

| SARS-CoV-2-S circulating variants | Mutation sites                                                                                                                                                                                                                                                                      |
|-----------------------------------|-------------------------------------------------------------------------------------------------------------------------------------------------------------------------------------------------------------------------------------------------------------------------------------|
| B.1.617.1                         | G142D, E154K, L452R, E484Q, D614G, P618R, Q1071H, and H1101D                                                                                                                                                                                                                        |
| B.1.617.2.V2                      | T19R, G142D, E156G, 157-158 FR deletion ( $\Delta$ FR157-158), L452R, T478K, D614G, P681R and D950N                                                                                                                                                                                 |
| B.1.429                           | S13I, W152C, and L452R                                                                                                                                                                                                                                                              |
| B.1.525                           | Q52R, A67V, $\Delta$ HV69-70, $\Delta$ Y145, E484K, D614G, Q677H, and F888L                                                                                                                                                                                                         |
| B.1.526                           | L5F, T95I, D253G, E484K, D614G, and A701V                                                                                                                                                                                                                                           |
| B.1.617                           | E154K, L452R, E484Q, and P681R                                                                                                                                                                                                                                                      |
| B.1.1.7 (Alpha)                   | $\Delta$ 69-70 HV, $\Delta$ 144 Y, N501Y, A570D, D614G, P681H, T761I, S982A, and D1118H                                                                                                                                                                                             |
| B.1.351 (Beta)                    | L18F, D80A, D215G, $\Delta$ LAL242-244, K417N, E484K, N501Y, D614G, and A701V                                                                                                                                                                                                       |
| B.1.1.28 (Gamma)                  | L18F, T20N, P26S, D138Y, R190S, K417T, E484K, N501Y, D614G, and H655Y.                                                                                                                                                                                                              |
| B.1.617.2 (Delta)                 | T19R, G142D, L452R, T478K, D614G, P681R and D950N                                                                                                                                                                                                                                   |
| C.37 (Lambda)                     | G75V, T76I, $\Delta$ R246, $\Delta$ S247, $\Delta$ Y248, $\Delta$ L249, $\Delta$ T250, $\Delta$ P251, $\Delta$ G252, D253N, L452Q, F490S, D614G, and T859N                                                                                                                          |
| B.1.621 (Mu)                      | T95I, Y146insN, R346K, E484K, N501Y, D614G, P681H, and D950N                                                                                                                                                                                                                        |
| B.1.1.529 (Omicron BA.1)          | A67V, $\Delta$ HV69-70, T95I, $\Delta$ GVY142-144, Y145D, $\Delta$ N211, L212I, ins214EPE, G339D, S371L, S373P, S375F, K417N, N440K, G446S, S477N, T478K, E484A, Q493R, G496S, Q498R, N501Y, Y505H, T547K, D614G, H655Y, N679K, P681H, N764K, D796Y, N856K, Q954H, N969K, and L981F |
| Omicron BA.2                      | T19I; $\Delta$ L24, $\Delta$ P25, $\Delta$ P26, A27S, G142D, V213G, G339D, S371F, S373P, S375F, T376A, D405N, R408S, K417N, N440K, S477N, T478K, E484A, Q493R, Q498R, N501Y, Y505H, D614G, H655Y, N679K, P681H, N764K, D796Y, Q954H, N969K                                          |
| Omicron BA.3                      | A67V, $\Delta$ 69-70, T95I, G142D, $\Delta$ V143, $\Delta$ Y144, $\Delta$ Y145, $\Delta$ N211, L212I, G339D, S371F, S373P, S375F, D405N, K417N, N440K, G446S, S477N, T478K, E484A, Q493R, Q498R, N501Y, Y505H, D614G, H655Y, N679K, P681H, N764K, D796Y, Q954H, N969K               |
| Omicron BA.4/5                    | T19I, L24S, $\Delta$ 25-27, $\Delta$ 69-70, G142D, V213G, G339D, S371F, S373P, S375F, T376A, D405N, R408S, K417N, N440K, L452R, S477N, T478K, E484A, F486V, Q498R, N501Y, Y505H, D614G, H655Y, N679K, P681H, N764K, D796Y, Q954H, N969K                                             |
