# Supplementary material
Source: PubMed Central journal article supplement (PMC9715643)
Supplement: 41422_2022_746_MOESM12_ESM.pdf [file 41422_2022_746_MOESM12_ESM.pdf]

**Supplementary information, Table S4: Primers for amplifying inflammation  
related cytokines in the lung tissues of hACE2 mice.**

| <b>Genes</b>       | <b>GenBank ID</b> | <b>Forward primer (5'-3')</b> | <b>Reverse primer (5'-3')</b> |
|--------------------|-------------------|-------------------------------|-------------------------------|
| mouse <i>ACTB</i>  | NM_007393.5       | GATATCGCTGCGCTGGTCG           | CATTCCCACCATCACACCCT          |
| mouse <i>IFNG</i>  | NM_008337.4       | CAGCAAGGCGAAAAAGGATGC         | CTTCCTGAGGCTGGATTCCG          |
| mouse <i>IL-2</i>  | NM_008366.3       | GAAACTCCCCAGGATGCTCA          | CGCAGAGGTCCAAGTTCATCT         |
| mouse <i>IL-4</i>  | NM_021283.2       | CCAAACGTCCTCACAGCAAC          | AGGCATCGAAAAGCCCGAA           |
| mouse <i>IL-6</i>  | NM_001314054.1    | AACCAAGAGATAAGCTGGAGTCAC      | AACGCACTAGGTTTGCCGAG          |
| mouse <i>IL-10</i> | NM_010548.2       | CCTGGGTGAGAAGCTGAAGAC         | CTTGTAGACACCTTGGTCTTGG        |
| mouse <i>IP-10</i> | NM_021274.2       | TGCAGGATGATGGTCAAGCC          | CCACTTGAGCGAGGACTCAG          |
| mouse <i>MX2</i>   | NM_013606.1       | GTCGCCTATTCACCAGGCTC          | TCGTCCACGGTACTGCTTTT          |
| mouse <i>TNFA</i>  | NM_013693.3       | ATGGCCTCCCTCTCATCAGT          | TTTGCTACGACGTGGGCTAC          |
