# Supplementary material
Source: PubMed Central journal article supplement (PMC9715643)
Supplement: 41422_2022_746_MOESM13_ESM.pdf [file 41422_2022_746_MOESM13_ESM.pdf]

**Supplementary information, Table S5: The peptide sequences of the HR1 domain.**

| <b>Serial No.</b> | <b>Peptides</b> | <b>Length (amino acid)</b> |
|-------------------|-----------------|----------------------------|
| 1                 | TQNVLYENQKLIANQ | 15                         |
| 2                 | LIANQFNSAIGKIQD | 15                         |
| 3                 | GKIQDLSSTASALG  | 15                         |
| 4                 | ASALGKLQDVVNQNA | 15                         |
| 5                 | VNQNAQALNTLVKQL | 15                         |
| 6                 | LVKQLSSNFGAISSV | 15                         |
| 7                 | AISSVLNDILSRLDK | 15                         |
| 8                 | SRLDKVE         | 7                          |
