# Supplementary material
Source: PubMed Central journal article supplement (PMC9715643)
Supplement: 41422_2022_746_MOESM15_ESM.pdf [file 41422_2022_746_MOESM15_ESM.pdf]

**Supplementary information, Video S1** HR121 monomer consists of two parallel HR1s packed with one antiparallel HR2. The two HR121 monomers aggregate in parallel together in an asymmetric manner; thus, HR121 dimer is formed with four parallel HR1s surrounded by two antiparallel HR2s.
